# Supplementary material
Source: PubMed Central journal article supplement (PMC5877414)
Supplement: NIHMS953057-supplement-supplement_1.pdf [file NIHMS953057-supplement-supplement_1.pdf]

**Supplementary Table 1.** Prediction of the fatty acid content of the lipid molecular species belonging to different lipid classes, isolated from *Synechocystis* wild-type (WT) and RO, AD and ROAD mutants and determined by MS.

| <b>Compound<br/>(total carbon: total<br/>double bond)</b> | <b>MGDG<br/>fatty acids<br/>(sn-1/sn-2)</b> | <b>DGDG<br/>fatty acids<br/>(sn-1/sn-2)</b> | <b>SQDG<br/>fatty acids<br/>(sn-1/sn-2)</b> | <b>PG<br/>fatty acids<br/>(sn-1/sn-2)</b> |
|-----------------------------------------------------------|---------------------------------------------|---------------------------------------------|---------------------------------------------|-------------------------------------------|
| 32:1                                                      | -                                           | -                                           | 16:1/16:0                                   | 16:1/16:0                                 |
| 32:0                                                      | -                                           | -                                           | 16:0/16:0                                   | 16:0/16:0                                 |
| 34:5                                                      | 18:4/16:1                                   | -                                           | -                                           | -                                         |
| 34:4                                                      | 18:3/16:1                                   | 18:3/16:1                                   | -                                           | -                                         |
| 34:3                                                      | 18:3/16:0                                   | 18:3/16:0                                   | 18:2/16:1                                   | 18:3/16:0                                 |
| 34:2                                                      | 18:1/16:1                                   | 18:1/16:1                                   | 18:2/16:0                                   | 18:2/16:0                                 |
| 34:1                                                      | 18:1/16:0                                   | 18:1/16:0                                   | 18:1/16:0                                   | 18:1/16:0                                 |
| 36:6                                                      | 18:3/18:3                                   | 18:3/18:3                                   | -                                           | -                                         |
| 36:5                                                      | 18:3/18:2                                   | 18:3/18:2                                   | -                                           | -                                         |
| 36:4                                                      | 18:2/18:2                                   | 18:3/18:1                                   | -                                           | -                                         |
| 36:3                                                      | 18:2/18:1                                   | 18:2/18:1                                   | -                                           | -                                         |
| 36:2                                                      | 18:1/18:1                                   | 18:1/18:1                                   | -                                           | -                                         |
| 36:1                                                      | 18:1/18:0                                   | -                                           | -                                           | -                                         |

Lipid molecular species are denoted as number of carbon atoms: number of double bond. In prediction of the fatty acid composition of the different molecular species we considered the largest acyl peak combinations obtained from MS/MS. Acyl positions were estimated on the basis of the the known preferences of acyl-transferases (Murata et al. 1992).

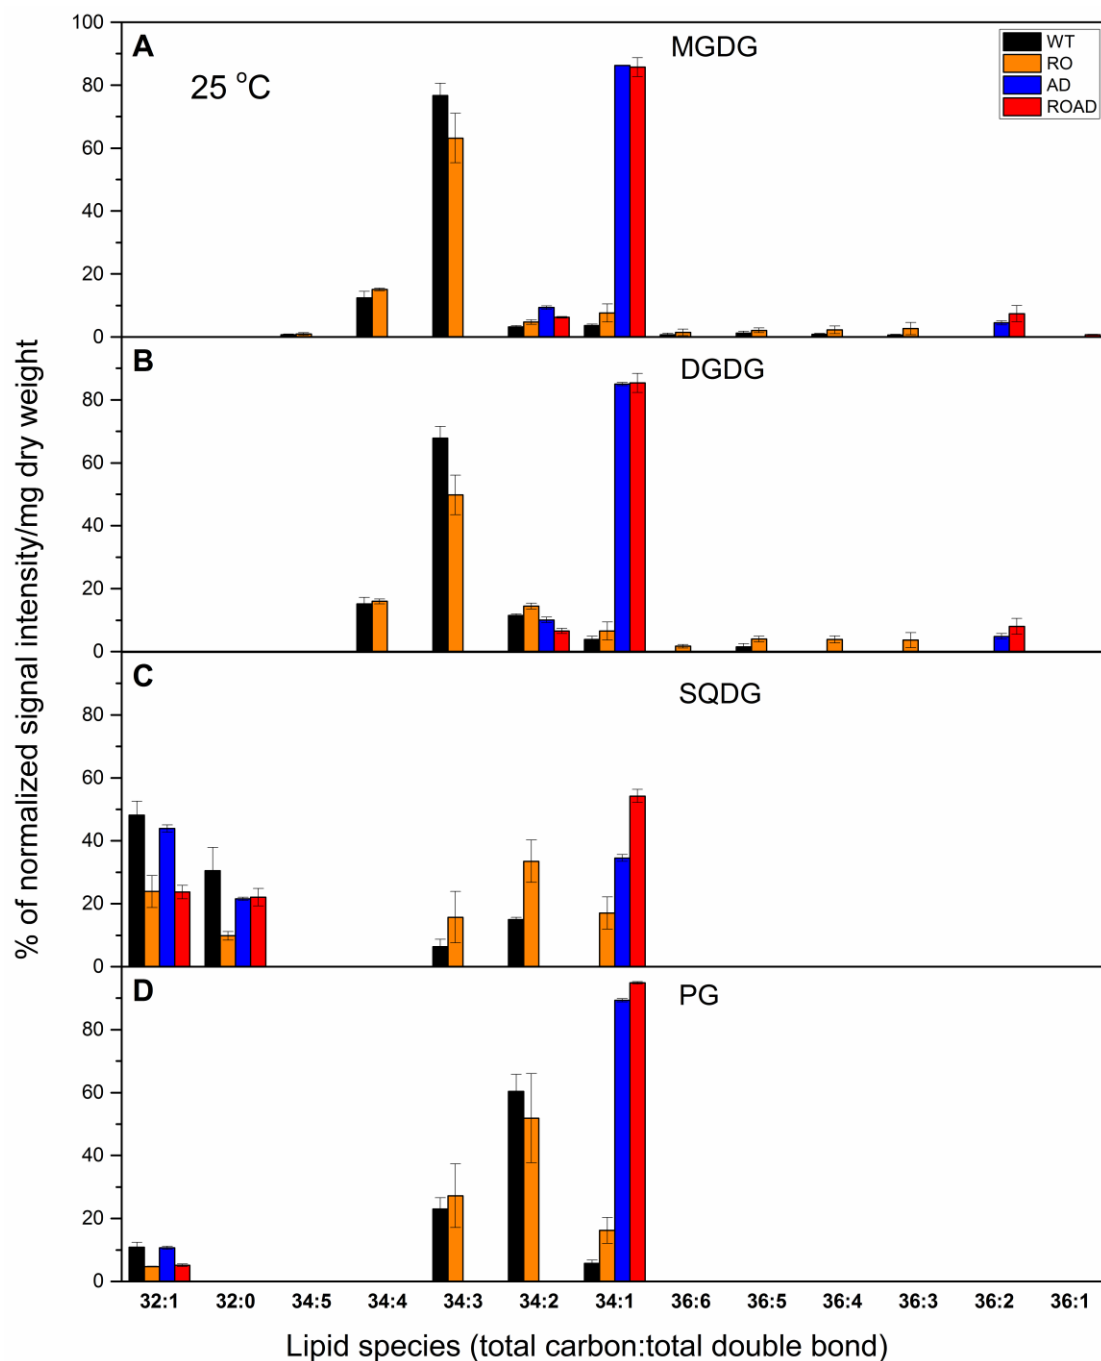

**Supplementary Fig. S1.** Lipid species of *Synechocystis* wild-type (WT) and mutants (RO, AD, ROAD) grown at 25°C. (A) MGDG, (B) DGDG, (C) SQDG and (D) PG lipid species. First numbers denote total carbon number, second numbers the total double bonds. Data shown are means $\pm$ SD of three independent biological replicates

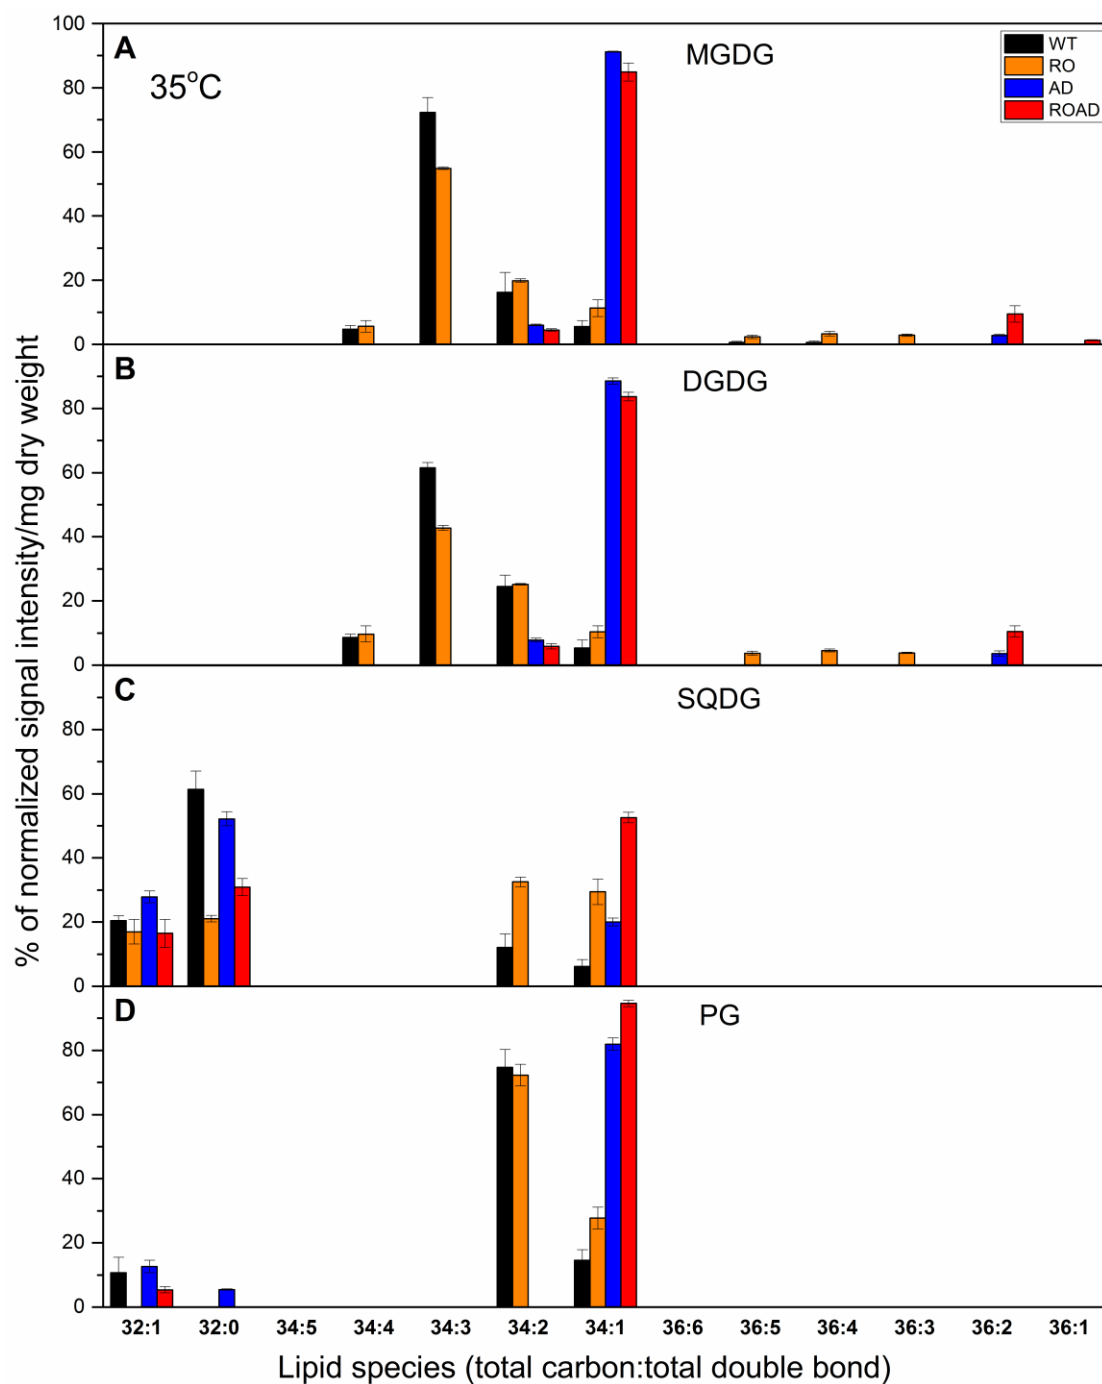

**Supplementary Fig. S2.** Lipid species of *Synechocystis* wild-type (WT) and mutants (RO, AD, ROAD) grown at 35°C. (A) MGDG, (B) DGDG, (C) SQDG and (D) PG lipid species. First numbers denote total carbon number, second numbers the total double bonds. Data shown are means $\pm$ SD of three independent biological replicates.

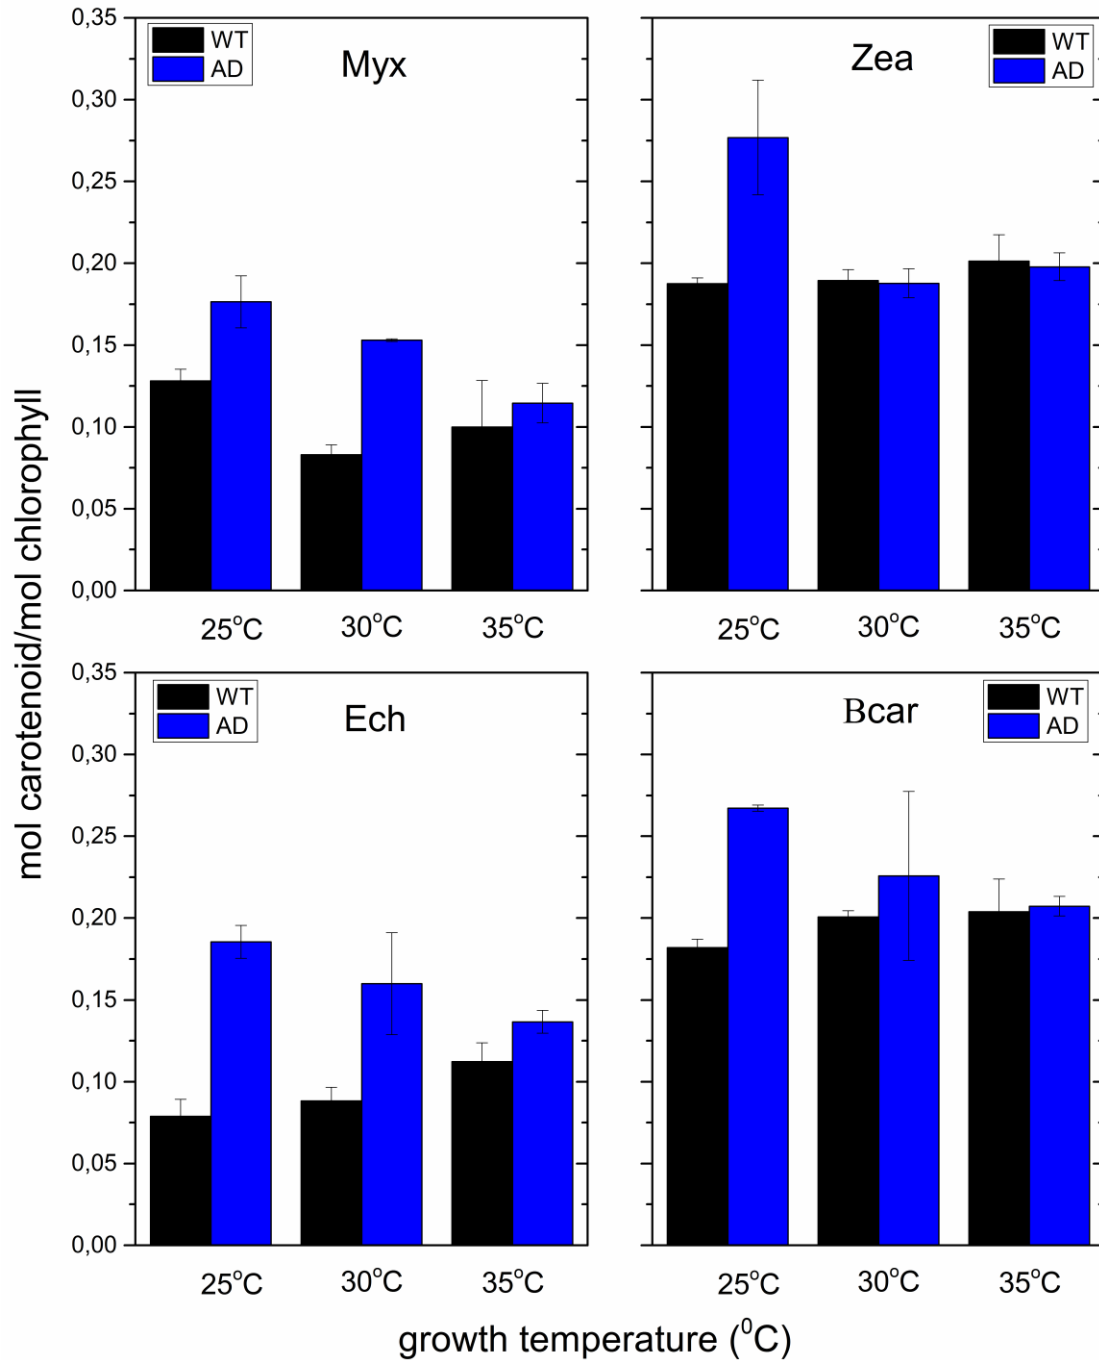

**Supplementary Fig. S3. Changes in individual carotenoid content of WT and AD cells grown at 25°C, 30°C and 35°C.** Abbreviations used: Myx (myxoxanthophyll); Zea (zeaxanthin); Ech (echinenon);  $\beta$ car ( $\beta$ -carotene). The values are averages  $\pm$  SD of three independent biological replicates.
